# Supplementary material
Source: ML conference proceedings conference paper supplement (https://openaccess.thecvf.com/content/CVPR_2020/html/Graber_Dynamic_Neural_Relational_CVPR_2020_paper.html)
Supplement: Supplementary file 2 [file Graber_Dynamic_Neural_Relational_CVPR_2020_supplemental.zip]

Archive with 41 entries (37 files):
- supplementary/
- supplementary/supplementary.pdf
- supplementary/videos/
- supplementary/videos/motion_118/
- supplementary/videos/motion_118/nri_dynamic_4.mp4
- supplementary/videos/motion_118/nri_dynamic_3.mp4
- supplementary/videos/motion_118/nri_dynamic_2.mp4
- supplementary/videos/motion_118/nri_dynamic_1.mp4
- supplementary/videos/motion_118/nri_4.mp4
- supplementary/videos/motion_118/nri_3.mp4
- supplementary/videos/motion_118/nri_2.mp4
- supplementary/videos/motion_118/nri_1.mp4
- supplementary/videos/motion_118/dnri_4.mp4
- supplementary/videos/motion_118/dnri_3.mp4
- supplementary/videos/motion_118/dnri_2.mp4
- supplementary/videos/motion_118/dnri_1.mp4
- supplementary/videos/motion_35/
- supplementary/videos/motion_35/nri_dynamic_8.mp4
- supplementary/videos/motion_35/nri_dynamic_7.mp4
- supplementary/videos/motion_35/nri_dynamic_6.mp4
- supplementary/videos/motion_35/nri_dynamic_5.mp4
- supplementary/videos/motion_35/nri_dynamic_4.mp4
- supplementary/videos/motion_35/nri_dynamic_3.mp4
- supplementary/videos/motion_35/nri_dynamic_2.mp4
- supplementary/videos/motion_35/nri_dynamic_1.mp4
- supplementary/videos/motion_35/nri_8.mp4
- supplementary/videos/motion_35/nri_7.mp4
- supplementary/videos/motion_35/nri_6.mp4
- supplementary/videos/motion_35/nri_5.mp4
- supplementary/videos/motion_35/nri_4.mp4
- supplementary/videos/motion_35/nri_3.mp4
- supplementary/videos/motion_35/nri_2.mp4
- supplementary/videos/motion_35/nri_1.mp4
- supplementary/videos/motion_35/dnri_8.mp4
- supplementary/videos/motion_35/dnri_7.mp4
- supplementary/videos/motion_35/dnri_6.mp4
- supplementary/videos/motion_35/dnri_5.mp4
- supplementary/videos/motion_35/dnri_4.mp4
- supplementary/videos/motion_35/dnri_3.mp4
- supplementary/videos/motion_35/dnri_2.mp4
- supplementary/videos/motion_35/dnri_1.mp4
